# Supplementary material for: Comparison of the Efficiency of Deammonification under Different DO Concentrations in a Laboratory-Scale Sequencing Batch Reactor
Source: MDPI journal article supplement (doi:10.3390/w14030368), 2022-01-26
Supplement: s1 [file s1]

# Comparison of the Efficiency of Deammonification under Different DO concentration in a Laboratory-Scale Sequencing Batch Reactor

Hussein Ezzi Al-Hazmi <sup>1,\*</sup>, Zhixuan Yin <sup>2</sup>, Dominika Grubba <sup>1</sup>, Joanna Majtacz <sup>1</sup> and Jacek Makinia <sup>1</sup>

<sup>1</sup> Affiliation 1 Faculty of Civil and Environmental Engineering, Gdansk University of Technology, Narutowicza Street 11/12, Gdansk 80-233 Poland; hussienalhazmi@yahoo.com, dominika.grubba@pg.edu.pl, joamajta@pg.edu.pl, jmakinia@pg.edu.pl

<sup>2</sup> School of Environmental and Municipal Engineering, Qingdao University of Technology, 11 Fushun Road, Qingdao 266033, PR China (zhixuanyin@outlook.com)

\* Correspondence: hussein.alhazmi66@gmail.com; Tel.: +48 730567469

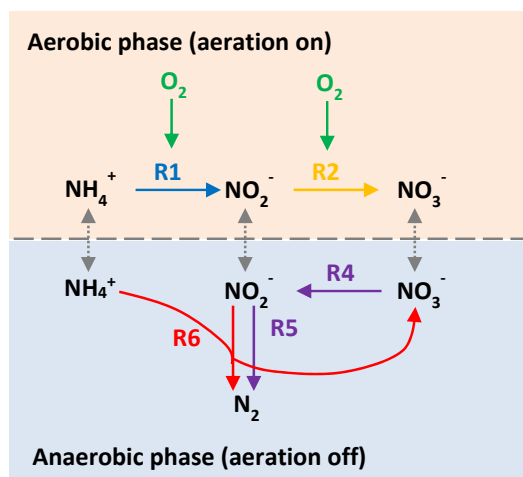

**Figure S1.** The conceptual model for nitrogen transformation under aeration on/off conditions. (R1: Aerobic growth of AOB; R2: Aerobic growth of NOB; R4-5: Anoxic growth of HDB; R6: Anaerobic growth of AnAOB).

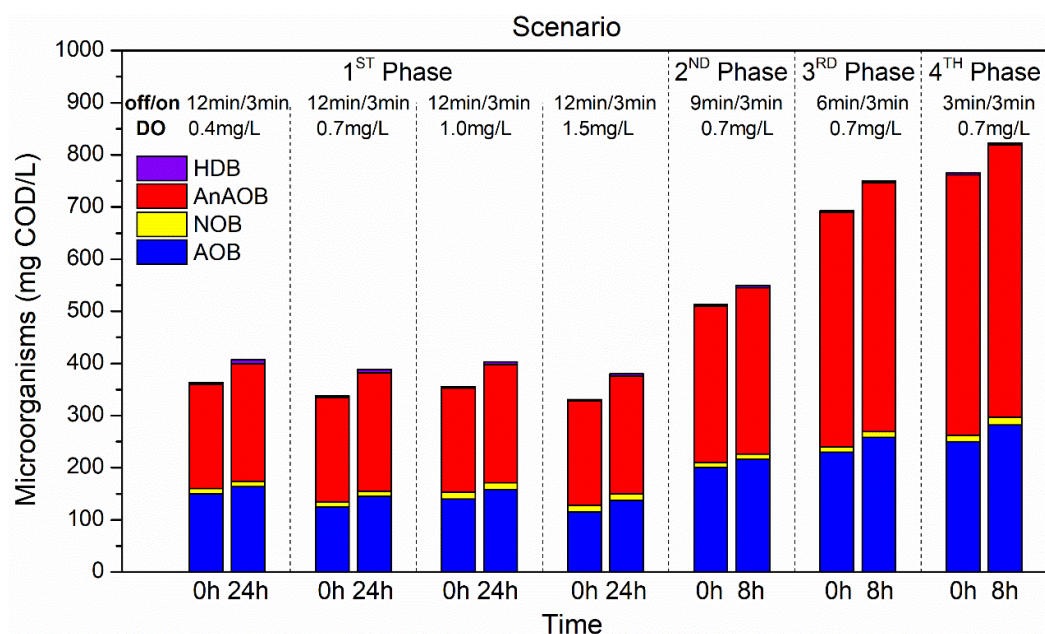

**Figure S2.** The initial microorganisms' composition and their predicted value after the batch test under different scenarios. (The initial composition was firstly estimated considering the results of our previous study (Al-Hazmi et al., 2020), metagenomic analysis and the measured MLVSS, and then the composition was slightly adjusted in during the preliminary model simulations).

Reference:

Al-Hazmi, H. E., Lu, X., Majtacz, J., et al. Optimization of the Aeration Strategies in a Deammonification Sequencing Batch Reactor for Efficient Nitrogen Removal and Mitigation of N<sub>2</sub>O Production[J]. *Environmental Science & Technology*, 2020, 55(2): 1218-1230.

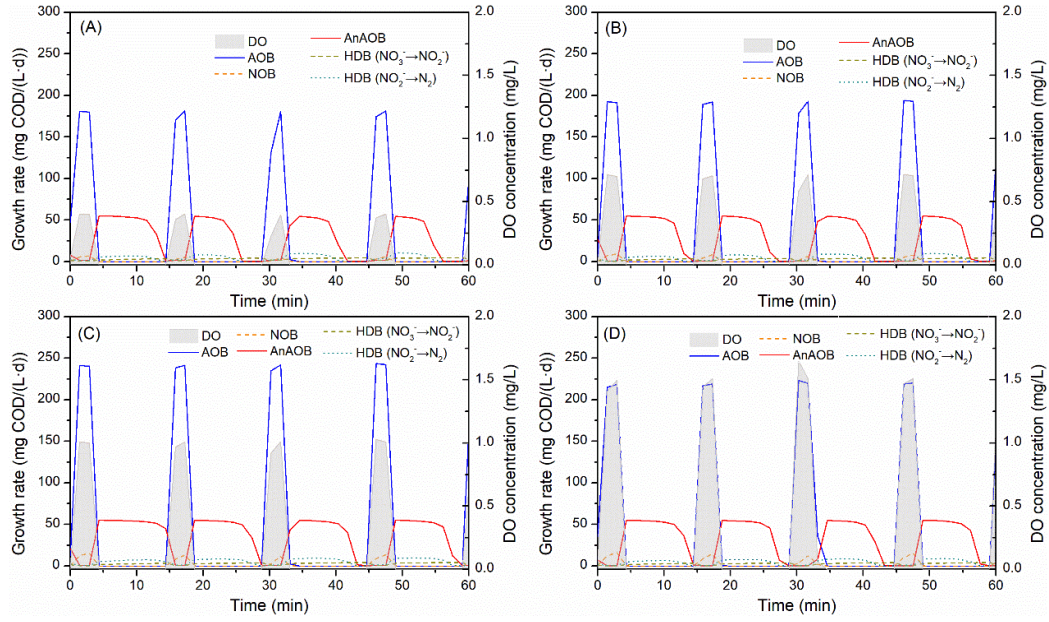

**Figure S3.** The variation in the simulated growth rates of different microorganisms with different DO set point of A) 0.4 mg O<sub>2</sub>/L, B) 0.7 mg O<sub>2</sub>/L, C) 1.0 mg O<sub>2</sub>/L, D) 1.5 mg O<sub>2</sub>/L at the same intermittent aeration mode off/on (12/3 min) conditions.

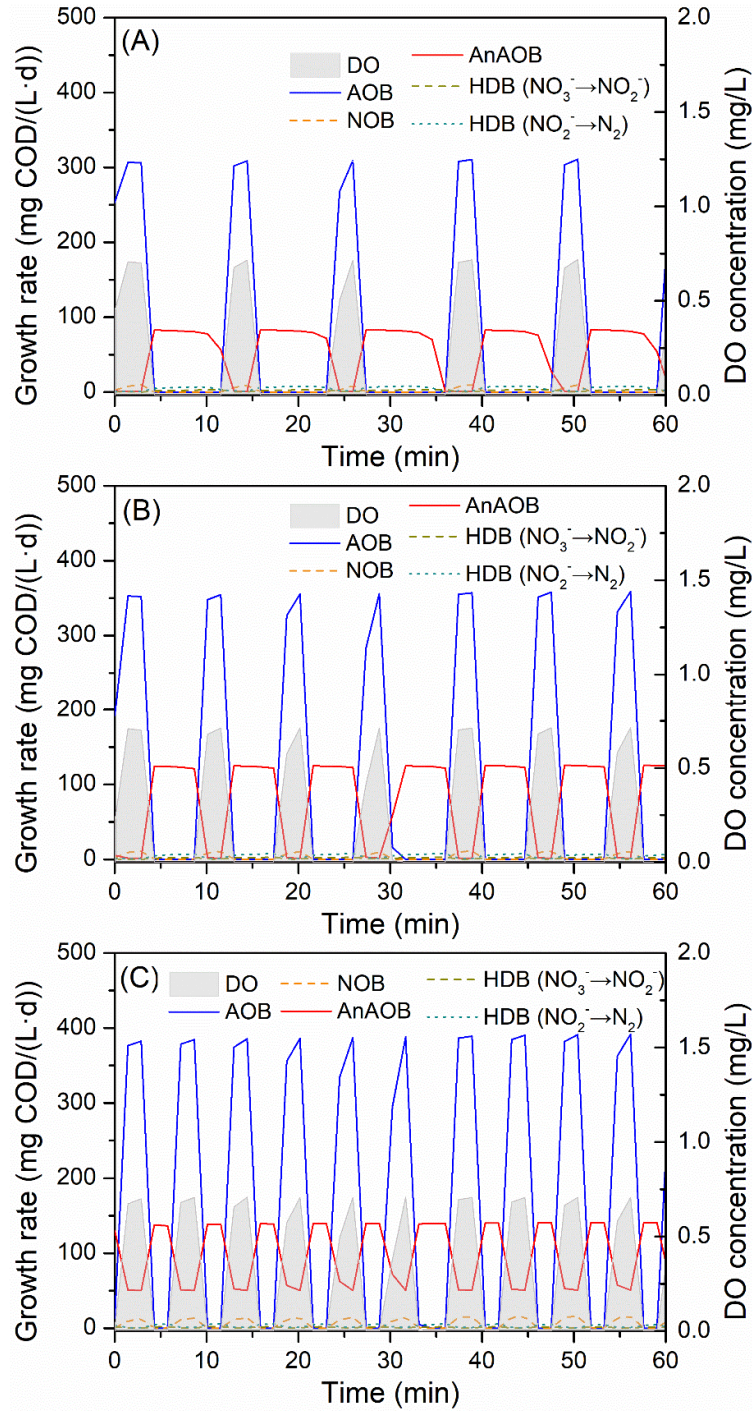

**Figure S4.** The variation in the simulated growth rates of different microorganisms with different intermittent aeration mode off/on A) 9min/3min, B) 6min/3min, C) 3min/3 min) at the same DO set point 0.7 mg O<sub>2</sub>/L.

**Table S1.** Definition of the state variables of the proposed model.

| No. | Symbol       | State variable                                  | Unit                 |
|-----|--------------|-------------------------------------------------|----------------------|
| 1   | $S_I$        | Inert soluble matter                            | mg COD/L             |
| 2   | $S_S$        | Readily biodegradable substrate                 | mg COD/L             |
| 3   | $S_{O_2}$    | Dissolved oxygen                                | mg O <sub>2</sub> /L |
| 4   | $S_{NO_3^-}$ | Nitrate                                         | mg N/L               |
| 5   | $S_{NO_2^-}$ | Nitrite                                         | mg N/L               |
| 6   | $S_{N_2}$    | Nitrogen gas                                    | mg N/L               |
| 7   | $S_{NH_4^+}$ | Ammonium and free ammonia                       | mg N/L               |
| 8   | $S_{ND}$     | Soluble biodegradable organic nitrogen          | mg N/L               |
| 9   | $X_{AOB}$    | Aerobic ammonium-oxidizing biomass(AOB)         | mg COD/L             |
| 10  | $X_{NOB}$    | Nitrite-oxidizing biomass(NO <sub>B</sub> )     | mg COD/L             |
| 11  | $X_H$        | Aerobic heterotrophs biomass                    | mg COD/L             |
| 12  | $X_{HDB}$    | Anoxic heterotrophic denitrifying biomass (HDB) | mg COD/L             |
| 13  | $X_{AnAOB}$  | Anaerobic ammonium-oxidizing biomass (AnAOB)    | mg COD/L             |
| 14  | $X_S$        | Slowly biodegradable substrate                  | mg COD/L             |
| 15  | $X_P$        | Particulate unbiodegradable matter              | mg COD/L             |
| 16  | $X_{ND}$     | Particulate biodegradable organic nitrogen      | mg N/L               |

**Table S2.** The matrix of the proposed model.

| Component →i |                                                                          | 1     | 2                    | 3                                 | 4                                  | 5                                  | 6                                 | 7                               | 8        | 9         | 10        | 11    | 12        | 13          | 14        | 15    | 16                    |
|--------------|--------------------------------------------------------------------------|-------|----------------------|-----------------------------------|------------------------------------|------------------------------------|-----------------------------------|---------------------------------|----------|-----------|-----------|-------|-----------|-------------|-----------|-------|-----------------------|
| Process ↓ j  |                                                                          | $S_I$ | $S_S$                | $S_{O_2}$                         | $S_{NO_3^-}$                       | $S_{NO_2^-}$                       | $S_{N_2}$                         | $S_{NH_4^+}$                    | $S_{ND}$ | $X_{AOB}$ | $X_{NOB}$ | $X_H$ | $X_{HDB}$ | $X_{AnAOB}$ | $X_S$     | $X_P$ | $X_{ND}$              |
| R1           | Aerobic growth of AOB,<br>$NH_4^+ \rightarrow NO_2^-$                    |       |                      | $-\frac{3.43 - Y_{AOB}}{Y_{AOB}}$ |                                    | $\frac{1}{Y_{AOB}}$                |                                   | $-i_{XB} - \frac{1}{Y_{AOB}}$   |          | 1         |           |       |           |             |           |       |                       |
| R2           | Aerobic growth of NOB,<br>$NO_2^- \rightarrow NO_3^-$                    |       |                      | $-\frac{1.14 - Y_{NOB}}{Y_{NOB}}$ | $\frac{1}{Y_{NOB}}$                | $-\frac{1}{Y_{NOB}}$               |                                   | $-i_{XB}$                       |          |           | 1         |       |           |             |           |       |                       |
| R3           | Aerobic growth of<br>Heterotrophs                                        |       | $-\frac{1}{Y_H}$     | $-\frac{1 - Y_H}{Y_H}$            |                                    |                                    |                                   | $-i_{XB}$                       |          |           |           | 1     |           |             |           |       |                       |
| R4           | Anoxic growth of HDB,<br>$NO_3^- \rightarrow NO_2^-$                     |       | $-\frac{1}{Y_{HDB}}$ |                                   | $-\frac{1 - Y_{HDB}}{1.14Y_{HDB}}$ | $\frac{1 - Y_{HDB}}{1.14Y_{HDB}}$  |                                   | $-i_{XB}$                       |          |           |           |       | 1         |             |           |       |                       |
| R5           | Anoxic growth of HDB,<br>$NO_2^- \rightarrow N_2$                        |       | $-\frac{1}{Y_{HDB}}$ |                                   |                                    | $-\frac{1 - Y_{HDB}}{1.71Y_{HDB}}$ | $\frac{1 - Y_{HDB}}{1.71Y_{HDB}}$ | $-i_{XB}$                       |          |           |           |       | 1         |             |           |       |                       |
| R6           | Anaerobic growth of AnAOB,<br>$NH_4^+ + NO_2^- \rightarrow N_2 + NO_3^-$ |       |                      |                                   | $\frac{1}{1.41}$                   | $-\frac{1}{Y_{AnAOB}} - 1.41$      | $\frac{2}{Y_{AnAOB}}$             | $-i_{XB} - \frac{1}{Y_{AnAOB}}$ |          |           |           |       |           | 1           |           |       |                       |
| R7           | Decay of AOB                                                             |       |                      |                                   |                                    |                                    |                                   |                                 |          | -1        |           |       |           |             | $1 - f_P$ | $f_P$ | $i_{XB} - f_P i_{XP}$ |
| R8           | Decay of NOB                                                             |       |                      |                                   |                                    |                                    |                                   |                                 |          |           | -1        |       |           |             | $1 - f_P$ | $f_P$ | $i_{XB} - f_P i_{XP}$ |
| R9           | Decay of Heterotrophs                                                    |       |                      |                                   |                                    |                                    |                                   |                                 |          |           |           | -1    |           |             | $1 - f_P$ | $f_P$ | $i_{XB} - f_P i_{XP}$ |
| R10          | Decay of HDB                                                             |       |                      |                                   |                                    |                                    |                                   |                                 |          |           |           |       | -1        |             | $1 - f_P$ | $f_P$ | $i_{XB} - f_P i_{XP}$ |
| R11          | Decay of AnAOB                                                           |       |                      |                                   |                                    |                                    |                                   |                                 |          |           |           |       |           | -1          | $1 - f_P$ | $f_P$ | $i_{XB} - f_P i_{XP}$ |
| R12          | Hydrolysis of entrapped<br>organics                                      | $f_I$ | $1 - f_I$            |                                   |                                    |                                    |                                   | $i_{XS}$                        |          |           |           |       |           |             | -1        |       |                       |
| R13          | Hydrolysis of entrapped<br>organic N                                     |       |                      |                                   |                                    |                                    |                                   |                                 | 1        |           |           |       |           |             |           |       | -1                    |
| R14          | Ammonification of soluble<br>organic N                                   |       |                      |                                   |                                    |                                    |                                   | 1                               | -1       |           |           |       |           |             |           |       |                       |

**Table S3.** The Kinetic equations of the proposed model.

| Process ↓ j |                                                                                                      | Rate equation                                                                                                                                                                                                                             |
|-------------|------------------------------------------------------------------------------------------------------|-------------------------------------------------------------------------------------------------------------------------------------------------------------------------------------------------------------------------------------------|
| R1          | Aerobic growth of AOB, $\text{NH}_4^+ \rightarrow \text{NO}_2^-$                                     | $\mu_{AOB}^{R1} \frac{S_{\text{NH}_4^+}}{K_{\text{NH}_4^+}^{R1} + S_{\text{NH}_4^+}} \frac{S_{\text{O}_2}}{K_{\text{O}_2}^{R1} + S_{\text{O}_2}} X_{AOB}$                                                                                 |
| R2          | Aerobic growth of NOB, $\text{NO}_2^- \rightarrow \text{NO}_3^-$                                     | $\mu_{NOB}^{R2} \frac{S_{\text{NO}_2^-}}{K_{\text{NO}_2^-}^{R2} + S_{\text{NO}_2^-}} \frac{S_{\text{O}_2}}{K_{\text{O}_2}^{R2} + S_{\text{O}_2}} X_{NOB}$                                                                                 |
| R3          | Aerobic growth of Heterotrophs                                                                       | $\mu_H^{R3} \frac{S_S}{K_S^{R3} + S_S} \frac{S_{\text{O}_2}}{K_{\text{O}_2,H} + S_{\text{O}_2}} X_H$                                                                                                                                      |
| R4          | Anoxic growth of HDB, $\text{NO}_3^- \rightarrow \text{NO}_2^-$                                      | $\mu_{HDB}^{R4} \frac{S_S}{K_S^{R4} + S_S} \frac{S_{\text{NO}_3^-}}{K_{\text{NO}_3^-}^{R4} + S_{\text{NO}_3^-}} \frac{K_{i,\text{O}_2,HDB}}{K_{i,\text{O}_2,HDB} + S_{\text{O}_2}} \eta_g^{R4} X_{HDB}$                                   |
| R5          | Anoxic growth of HDB, $\text{NO}_2^- \rightarrow \text{N}_2$                                         | $\mu_{HDB}^{R5} \frac{S_S}{K_S^{R5} + S_S} \frac{S_{\text{NO}_2^-}}{K_{\text{NO}_2^-}^{R5} + S_{\text{NO}_2^-}} \frac{K_{i,\text{O}_2,HDB}}{K_{i,\text{O}_2,HDB} + S_{\text{O}_2}} \eta_g^{R5} X_{HDB}$                                   |
| R6          | Anaerobic growth of AnAOB,<br>$\text{NH}_4^+ + \text{NO}_2^- \rightarrow \text{N}_2 + \text{NO}_3^-$ | $\mu_{AnAOB}^{R6} \frac{S_{\text{NH}_4^+}}{K_{\text{NH}_4^+}^{R6} + S_{\text{NH}_4^+}} \frac{S_{\text{NO}_2^-}}{K_{\text{NO}_2^-}^{R6} + S_{\text{NO}_2^-}} \frac{K_{i,\text{O},AnAOB}}{K_{i,\text{O},AnAOB} + S_{\text{O}_2}} X_{AnAOB}$ |
| R7          | Decay of AOB                                                                                         | $b_{AOB} X_{AOB}$                                                                                                                                                                                                                         |
| R8          | Decay of NOB                                                                                         | $b_{NOB} X_{NOB}$                                                                                                                                                                                                                         |

|     |                                     |                                                                                                                                                                                                                                           |
|-----|-------------------------------------|-------------------------------------------------------------------------------------------------------------------------------------------------------------------------------------------------------------------------------------------|
| R9  | Decay of Heterotrophs               | $b_H X_H$                                                                                                                                                                                                                                 |
| R10 | Decay of HDB                        | $b_{HDB} X_{HDB}$                                                                                                                                                                                                                         |
| R11 | Decay of AnAOB                      | $b_{AnAOB} X_{AnAOB}$                                                                                                                                                                                                                     |
| R12 | Hydrolysis of entrapped organics    | $k_h \frac{X_S/X_H}{K_X + (X_S/X_H)} \left[ \left( \frac{S_{O_2}}{K_{O_2,H} + S_{O_2}} \right) + \eta_{hANOX} \left( \frac{K_{O_2,H}}{K_{O_2,H} + S_{O_2}} \right) \left( \frac{S_{NO_3^-}}{K_{NO_3^-} + S_{NO_3^-}} \right) \right] X_H$ |
| R13 | Hydrolysis of entrapped organic N   | $r_{12} (X_{ND}/X_S)$                                                                                                                                                                                                                     |
| R14 | Ammonification of soluble organic N | $K_a \cdot S_{ND} \cdot X_H$                                                                                                                                                                                                              |



**Table S4.** Stoichiometric parameters and conversion factors.

| Symbol                                  | Definition                                                | Unit        | Reference range | Default | Calibrated | References           |
|-----------------------------------------|-----------------------------------------------------------|-------------|-----------------|---------|------------|----------------------|
| <b>Model stoichiometry</b>              |                                                           |             |                 |         |            |                      |
| $Y_{AOB}$                               | AOB yield                                                 | g COD/g N   | 0.15-0.24       | 0.18    |            | 1-13                 |
| $Y_{NOB}$                               | NOB yield                                                 | g COD/g N   | 0.041-0.06      | 0.06    |            | 1,3,5,6,7, 8,13,15   |
| $Y_H$                                   | heterotrophic yield                                       | g COD/g COD | 0.5-0.67        | 0.666   |            | 1,3,7,8,13, 14,16,17 |
| $Y_{HDB}$                               | HDB yield                                                 | g COD/g COD | 0.5-0.67        | 0.666   |            | 1,3,7,8,13, 14,16,17 |
| $Y_{AnAOB}$                             | AMX yield                                                 | g COD/g N   | 0.114-0.17      | 0.17    |            | 13,15, 18-24         |
| $f_p$                                   | fraction of biomass leading to particulate products       | g COD/g COD | 0.08-0.2        | 0.08    |            | 1,3,7,13, 14,22      |
| $f_I$                                   | Production of soluble inerts in hydrolysis                | g COD/g COD | 0.02            | 0.02    |            | 14                   |
| <b>Composite variable stoichiometry</b> |                                                           |             |                 |         |            |                      |
| icv                                     | XCOD/VSS                                                  | g COD/g VSS | 1.42-1.48       | 1.48    |            | 14,25                |
| fbod                                    | BOD <sub>5</sub> /BOD <sub>ultimate</sub> ratio           | -           | 0.66            | 0.66    |            | 14                   |
| $i_{XB}$                                | N content of active biomass                               | g N/g COD   | 0.07-0.875      | 0.086   |            | 1-4,6-15, 18         |
| $i_{XP}$                                | N content of endogenous/inert mass                        | g N/g COD   | 0.02-0.068      | 0.06    |            | 1,3,13,14            |
| $i_{XS}$                                | nitrogen content of COD in slowly biodegradable substrate | g N/g COD   | 0.015           | 0.015   |            | 14                   |

**References:** <sup>1</sup>(Hiatt and Grady, 2008); <sup>2</sup>(Law et al., 2012); <sup>3</sup>(Ni et al., 2011); <sup>4</sup>(Mampaey et al., 2011); <sup>5</sup>(Wiesmann et al., 1994); <sup>6</sup>(Mampaey et al., 2013); <sup>7</sup>(Kampschreur et al., 2007); <sup>8</sup>(Ni et al., 2013a); <sup>9</sup>(Ni et al., 2013b); <sup>10</sup>(Peng et al., 2015a and 2015b); <sup>11</sup>(Pocquet et al., 2013); <sup>12</sup>(Guo and Vanrolleghem, 2014); <sup>13</sup>(von Schulthess and Gujer, 1996); <sup>14</sup>(Henze et al., 2000); <sup>15</sup>(Volcke et al., 2010); <sup>16</sup>(Samie et al., 2011); <sup>17</sup>(Pan et al., 2013); <sup>18</sup>(Takács et al., 2007); <sup>19</sup>(Koch et al., 2000); <sup>20</sup>(Strous et al., 1998); <sup>21</sup>(Bi et al., 2015); <sup>22</sup>(Dapena-Mora et al., 2004); <sup>23</sup>(Hao et al., 2002); <sup>24</sup>(Ni et al., 2009); <sup>25</sup>(Comeau, 2008)

**Table S5.** Kinetic parameters and their values (\*value at T = 20°C).

| Symbol              | Definition                                                  | Unit                             | Reference range | Default | Calibrated | References                  |
|---------------------|-------------------------------------------------------------|----------------------------------|-----------------|---------|------------|-----------------------------|
| <b>AOB</b>          |                                                             |                                  |                 |         |            |                             |
| $\mu_{AOB}^{R1}$    | the maximum specific growth rate                            | 1/d                              | 0.39-5.76       | 1.2     |            | 1-17                        |
| $K_{NH_4^+}^{R1}$   | ammonia half saturation coefficient                         | g N/m <sup>3</sup>               | 0.02-27.5       | 1       |            | 1,4,5, 8-12, 18-22          |
| $K_{O_2}^{R1}$      | oxygen half saturation coefficient                          | g O <sub>2</sub> /m <sup>3</sup> | 0.02-2.1        | 0.4     |            | 1,2,4-6, 8-15, 18-20, 22,23 |
| $b_{AOB}$           | AOB decay rate                                              | 1/d                              | 0.071-0.13      | 0.096   |            | 2,5,8, 9,19                 |
| <b>NOB</b>          |                                                             |                                  |                 |         |            |                             |
| $\mu_{NOB}^{R2}$    | the maximum specific growth rate                            | 1/d                              | 0.38-1.44       | 1.44    |            | 2,3,5, 6,8,9, 16,17,19,     |
| $K_{NO_2^-}^{R2}$   | nitrite half saturation coefficient                         | g N/m <sup>3</sup>               | 0.16-5.5        | 1.2     |            | 5,8,9, 16,19,22, 24         |
| $K_{O_2}^{R2}$      | oxygen half saturation coefficient                          | g O <sub>2</sub> /m <sup>3</sup> | 0.16-2.2        | 0.74    |            | 2,5,6, 8,9,16, 19,22-25     |
| $b_{NOB}$           | NOB decay rate                                              | 1/d                              | 0.06-0.096      | 0.096   |            | 2,5,8, 9,19                 |
| <b>Heterotrophs</b> |                                                             |                                  |                 |         |            |                             |
| $\mu_H^{R3}$        | heterotrophic maximum specific growth rate                  | 1/d                              | 2-6.25          | 6       |            | 1-3,8,9                     |
| $K_S^{R3}$          | readily biodegradable substrate half saturation coefficient | g COD/m <sup>3</sup>             | 2-20            | 2       |            | 1-3,5, 9,26,27              |
| $K_{O_2,H}$         | oxygen half saturation coefficient                          | g O <sub>2</sub> /m <sup>3</sup> | 0.1-2           | 0.2     |            | 1-3,5, 8,9,26               |
| $b_H$               | aerobic heterotrophic                                       | 1/d                              | 0.2-0.62        | 0.62    |            | 1-3,5, 9                    |

| Symbol            | Definition                                                  | Unit                             | Reference range | Default | Calibrated | References        |
|-------------------|-------------------------------------------------------------|----------------------------------|-----------------|---------|------------|-------------------|
|                   | decay rate                                                  |                                  |                 |         |            |                   |
| <b>HDB</b>        |                                                             |                                  |                 |         |            |                   |
| $\mu_{HDB}^{R4}$  | heterotrophic maximum specific growth rate                  | 1/d                              | 2-6.25          | 6       |            | 1-3,8,9           |
| $\mu_{HDB}^{R5}$  | heterotrophic maximum specific growth rate                  | 1/d                              | 2-6.25          | 6       |            | 1-3,8,9           |
| $K_S^{R4}$        | readily biodegradable substrate half saturation coefficient | g COD/m <sup>3</sup>             | 2-20            | 20      |            | 1-3,5, 9,26,27    |
| $K_S^{R5}$        | readily biodegradable substrate half saturation coefficient | g COD/m <sup>3</sup>             | 2-20            | 2       |            | 1-3,5, 9,26,27    |
| $K_{NO_3^-}^{R4}$ | nitrate half saturation coefficient                         | g N/m <sup>3</sup>               | 0.2-0.5         | 0.5     |            | 1-3,5, 8,9,26, 28 |
| $K_{NO_2^-}^{R5}$ | nitrite half saturation coefficient                         | g N/m <sup>3</sup>               | 0.06-8          | 0.2     |            | 2,3,5, 8,9,26, 28 |
| $K_{i,O_2,HDB}$   | oxygen inhibition coefficient                               | g O <sub>2</sub> /m <sup>3</sup> | 0.1-2           | 0.2     |            | 1-3,5, 8,9,26     |
| $\eta_g^{R4}$     | anoxic growth factor 1, reducing nitrate to nitrite         | -                                | 0.029-0.8       | 0.2     |            | 1-3,9,29          |
| $\eta_g^{R5}$     | anoxic growth factor 2, reducing nitrite to dinitrogen      | -                                | 0.075-0.81      | 0.6     |            | 2,3,9, 29,30      |
| $b_{HDB}$         | anoxic heterotrophic decay rate                             | 1/d                              | 0.2-0.62        | 0.62    |            | 1-3,5, 9          |
| <b>AnAOB</b>      |                                                             |                                  |                 |         |            |                   |

| Symbol                | Definition                                                 | Unit                             | Reference range | Default | Calibrated | References         |
|-----------------------|------------------------------------------------------------|----------------------------------|-----------------|---------|------------|--------------------|
| $\mu_{AnAOB}^{R6}$    | the maximum specific growth rate                           | 1/d                              | 0.019-0.14      | 0.03    | 0.14       | 3,16-17, 27,31-36  |
| $K_{NH_4^+}^{R6}$     | ammonia half saturation coefficient                        | g N/m <sup>3</sup>               | 0.03-21         | 0.07    |            | 16,31,32, 34,37-39 |
| $K_{NO_2^-}^{R6}$     | nitrite half saturation coefficient                        | g N/m <sup>3</sup>               | 0.005-2         | 0.05    |            | 16,31-34, 38,39,40 |
| $K_{i,O,AnAOB}$       | oxygen inhibition coefficient                              | g O <sub>2</sub> /m <sup>3</sup> | 0.01-0.4        | 0.01    | 0.4        | 31,37,38           |
| $b_{AnAOB}$           | anammox bacteria decay rate                                | 1/d                              | 0.0003-0.016    | 0.003   |            | 3,27, 31-34        |
| <b>Hydrolysis</b>     |                                                            |                                  |                 |         |            |                    |
| $k_h$                 | maximum specific hydrolysis rate                           | 1/d                              | 1.5-4.5         | 3       |            | 1,2,5 9,30         |
| $K_X$                 | slowly biodegradable substrate half saturation coefficient | g COD/g COD                      | 0.03-1          | 0.03    |            | 1,2,5 9            |
| $\eta_{hANOX}$        | anoxic hydrolysis factor                                   | -                                | 0.4-0.8         | 0.4     |            | 1,2                |
| <b>Ammonification</b> |                                                            |                                  |                 |         |            |                    |
| $K_a$                 | ammonification rate                                        | m <sup>3</sup> /g COD/d          | 0.08-0.1608     | 0.08    |            | 1,2                |

**References:** <sup>1</sup>(Henze et al., 2000); <sup>2</sup>(Hiatt and Grady, 2008); <sup>3</sup>(Samie et al., 2011); <sup>4</sup>(Law et al., 2012); <sup>5</sup>(Ni et al., 2011); <sup>6</sup>(Mampaey et al., 2013); <sup>7</sup>(Hellings et al., 1998); <sup>8</sup>(Kampschreur et al., 2007); <sup>9</sup>(Ni et al., 2013a); <sup>10</sup>(Ni et al., 2013b); <sup>11</sup>(Ni et al., 2014b); <sup>12</sup>(Peng et al., 2015a and 2015b); <sup>13</sup>(Pocquet et al., 2013); <sup>14</sup>(Guo and Vanrolleghem, 2014); <sup>15</sup>(Pocquet et al., 2016); <sup>16</sup>(Van Hulle et al., 2012); <sup>17</sup>(Ni et al., 2014a); <sup>18</sup>(Mampaey et al., 2011); <sup>19</sup>(Wiesmann et al., 1994); <sup>20</sup>(Van Hulle et al., 2007); <sup>21</sup>(Pynaert, 2003); <sup>22</sup>(Cao et al., 2017); <sup>23</sup>(Guisasola et al., 2005); <sup>24</sup>(Hydromantis, 2014); <sup>25</sup>(Isanta et al., 2015); <sup>26</sup>(von Schulthess and Gujer, 1996); <sup>27</sup>(Liu et al., 2016); <sup>28</sup>(Pan et al., 2013); <sup>29</sup>(Pan et al., 2015); <sup>30</sup>(Mannina et al., 2018); <sup>31</sup>(Koch et al., 2000); <sup>32</sup>(Dapena-Mora et al., 2004); <sup>33</sup>(Hao et al., 2002); <sup>34</sup>(Ni et al., 2009); <sup>35</sup>(Lotti et al., 2015); <sup>36</sup>(Bae et al., 2010); <sup>37</sup>(Strous et al., 1998); <sup>38</sup>(Bi et al., 2015); <sup>39</sup>(Stewart et al., 2017); <sup>40</sup>(Lotti et al., 2014)

**Table S6.** Sensitivity coefficients calculated for the adjusted stoichiometric parameters.

|             | $\text{NH}_4^+$ | $\text{NO}_2^-$ | $\text{NO}_3^-$ |          | $\text{NH}_4^+$ | $\text{NO}_2^-$ | $\text{NO}_3^-$ |
|-------------|-----------------|-----------------|-----------------|----------|-----------------|-----------------|-----------------|
| $Y_{AOB}$   | <b>1.1240</b>   | <b>-3.7559</b>  | -0.0680         | $f_P$    | -0.0349         | 0.0053          | 0.0008          |
| $Y_{NOB}$   | -0.0024         | <b>0.5836</b>   | <b>-0.2832</b>  | $f_I$    | -0.0019         | 0.0552          | 0.0444          |
| $Y_H$       | 0.0091          | <b>-0.5809</b>  | -0.0142         | $i_{XB}$ | <b>0.2848</b>   | -0.0271         | 0.0001          |
| $Y_{HDB}$   | -0.0021         | 0.0040          | 0.0022          | $i_{XP}$ | 0.0330          | 0.0044          | -0.0011         |
| $Y_{AnAOB}$ | <b>0.5607</b>   | <b>2.7116</b>   | 0.0459          |          |                 |                 |                 |

**Table S7.** Sensitivity coefficients calculated for the adjusted kinetic parameters.

|                       | $\text{NH}_4^+$ | $\text{NO}_2^-$ | $\text{NO}_3^-$ |                   | $\text{NH}_4^+$ | $\text{NO}_2^-$ | $\text{NO}_3^-$ |
|-----------------------|-----------------|-----------------|-----------------|-------------------|-----------------|-----------------|-----------------|
| <b>AOB</b>            |                 |                 |                 |                   |                 |                 |                 |
| $\mu_{AOB}^{R1}$      | <b>-1.2539</b>  | <b>3.9972</b>   | 0.0734          | $K_{O_2}^{R1}$    | <b>0.3525</b>   | <b>-1.2334</b>  | -0.0066         |
| $K_{NH_4^+}^{R1}$     | 0.0049          | -0.0427         | 0.0009          | $b_{AOB}$         | 0.0161          | -0.0460         | 0.0003          |
| <b>NOB</b>            |                 |                 |                 |                   |                 |                 |                 |
| $\mu_{NOB}^{R2}$      | 0.0016          | <b>-0.6168</b>  | <b>0.3008</b>   | $K_{O_2}^{R2}$    | -0.0009         | <b>0.3368</b>   | -0.1627         |
| $K_{NO_2^-}^{R2}$     | -0.0022         | 0.0505          | -0.0224         | $b_{NOB}$         | 0.0004          | 0.0073          | -0.0049         |
| <b>Heterotrophs</b>   |                 |                 |                 |                   |                 |                 |                 |
| $\mu_H^{R3}$          | -0.0008         | 0.0005          | 0.0004          | $K_{O_2,H}$       | -0.0014         | 0.0119          | 0.0009          |
| $K_S^{R3}$            | 0.0005          | 0.0010          | 0.0004          | $b_H$             | <b>0.2815</b>   | 0.1174          | 0.0003          |
| <b>HDB</b>            |                 |                 |                 |                   |                 |                 |                 |
| $\mu_{HDB}^{R4}$      | 0.0000          | 0.0013          | -0.0013         | $K_{NO_2^-}^{R5}$ | 0.0000          | 0.0000          | 0.0000          |
| $\mu_{HDB}^{R5}$      | 0.0000          | -0.0032         | 0.0000          | $K_{i,O_2,HDB}$   | -0.0014         | 0.0119          | 0.0009          |
| $K_S^{R4}$            | 0.0005          | 0.0010          | 0.0004          | $\eta_g^{R4}$     | 0.0000          | 0.0013          | -0.0013         |
| $K_S^{R5}$            | 0.0005          | 0.0010          | 0.0004          | $\eta_g^{R5}$     | 0.0000          | -0.0032         | 0.0000          |
| $K_{NO_3^-}^{R4}$     | 0.0000          | 0.0000          | 0.0000          | $b_{HDB}$         | 0.0004          | 0.0000          | 0.0000          |
| <b>AnAOB</b>          |                 |                 |                 |                   |                 |                 |                 |
| $\mu_{AnAOB}^{R6}$    | <b>-0.5824</b>  | <b>-3.1105</b>  | 0.1033          | $K_{i,O,AnAOB}$   | -0.0870         | <b>-0.4533</b>  | 0.0152          |
| $K_{NH_4^+}^{R6}$     | 0.0024          | 0.0030          | -0.0012         | $b_{AnAOB}$       | 0.0007          | 0.0004          | 0.0000          |
| $K_{NO_2^-}^{R6}$     | 0.0021          | 0.0122          | -0.0014         |                   |                 |                 |                 |
| <b>Hydrolysis</b>     |                 |                 |                 |                   |                 |                 |                 |
| $k_h$                 | -0.0057         | -0.0272         | -0.0015         | $\eta_{hANOX}$    | -0.0055         | -0.0080         | -0.0003         |
| $K_X$                 | 0.0033          | 0.0188          | 0.0009          |                   |                 |                 |                 |
| <b>Ammonification</b> |                 |                 |                 |                   |                 |                 |                 |
| $K_a$                 | <b>-0.8837</b>  | -0.0038         | 0.0000          |                   |                 |                 |                 |

## References

- Bae, H., Park, K.-S., Chung, Y.-C., Jung, J.-Y., 2010. Distribution of anammox bacteria in domestic WWTPs and their enrichments evaluated by real-time quantitative PCR. *Process Biochemistry* 45, 323–334. <https://doi.org/10.1016/j.procbio.2009.10.004>
- Bi, Z., Takekawa, M., Giri, P., Soda, S., Zhou, J., Qiao, S., Ike, M., Zhen, B., Takekawa, M., Park, G., Soda, S., Qiao, S., Ike, M., 2015. Effects of the C/N ratio and bacterial populations on nitrogen removal in the simultaneous anammox and heterotrophic denitrification process: Mathematic modeling and batch experiments. *Chemical Engineering Journal* 280, 606–613. <https://doi.org/10.1016/j.cej.2015.06.028>
- Cao, Y., van Loosdrecht, M.C.M., Daigger, G.T., 2017. Mainstream partial nitrification–anammox in municipal wastewater treatment: status, bottlenecks, and further studies. *Applied Microbiology and Biotechnology* 101, 1365–1383. <https://doi.org/10.1007/s00253-016-8058-7>
- Dapena-Mora, A., Van Hulle, S.W., Luis Campos, J., Méndez, R., Vanrolleghem, P.A., Jetten, M., 2004. Enrichment of Anammox biomass from municipal activated sludge: experimental and modelling results: Experimental and modelling results of Anammox enrichment. *Journal of Chemical Technology & Biotechnology* 79, 1421–1428. <https://doi.org/10.1002/jctb.1148>
- Guisasola, A., Jubany, I., Baeza, J.A., Carrera, J., Lafuente, J., 2005. Respirometric estimation of the oxygen affinity constants for biological ammonium and nitrite oxidation. *Journal of Chemical Technology and Biotechnology* 80, 388–396. <https://doi.org/10.1002/jctb.1202>
- Guo, L., Vanrolleghem, P.A., 2014. Calibration and validation of an activated sludge model for greenhouse gases no. 1 (ASMG1): Prediction of temperature-dependent N<sub>2</sub>O emission dynamics. *Bioprocess and Biosystems Engineering* 37, 151–163. <https://doi.org/10.1007/s00449-013-0978-3>
- Hao, X., Heijnen, J.J., van Loosdrecht, M.C.M., 2002. Sensitivity analysis of a biofilm model describing a one-stage completely autotrophic nitrogen removal (CANON) process. *Biotechnology and Bioengineering* 77, 266–277. <https://doi.org/10.1002/bit.10105>
- Hellinga, C., Schellen, A.A.J.C., Mulder, J.W., Van Loosdrecht, M.C.M., Heijnen, J.J., 1998. The SHARON process: An innovative method for nitrogen removal from ammonium-rich waste water. *Water Science and Technology* 37, 135–142. [https://doi.org/10.1016/S0273-1223\(98\)00281-9](https://doi.org/10.1016/S0273-1223(98)00281-9)
- Henze, M., Gujer, W., Mino, T., van Loosdrecht, M., 2000. *Activated Sludge Models ASM1, ASM2, ASM2d and ASM3*. IWA Publishing, UK.
- Hiatt, W.C., Grady, C.P.L., 2008. An updated process model for carbon oxidation, nitrification, and denitrification. *Water environment research : a research publication of the Water Environment Federation* 80, 2145–2156. <https://doi.org/10.2175/106143008X304776>
- Hydromantis, 2014. GPS-X Technical Reference.

Isanta, E., Reino, C., Carrera, J., Pérez, J., 2015. Stable partial nitrification for low-strength wastewater at low temperature in an aerobic granular reactor. *Water Research* 80, 149–158. <https://doi.org/10.1016/j.watres.2015.04.028>

Kampschreur, M.J., Picioreanu, C., Tan, N., Kleerebezem, R., Jetten, M.S.M., van Loosdrecht, M.C.M., 2007. Unraveling the source of nitric oxide emission during nitrification. *Water Environ Res* 79, 2499–2509. <https://doi.org/10.2175/193864707787976470>

Koch, G., Egli, K., Van der Meer, J.R., Siegrist, H., 2000. Mathematical modeling of autotrophic denitrification in a nitrifying biofilm of a rotating biological contactor. *Water Science and Technology* 41, 191–198.

Law, Y., Ni, B.-J., Lant, P., Yuan, Z., 2012. N<sub>2</sub>O production rate of an enriched ammonia-oxidising bacteria culture exponentially correlates to its ammonia oxidation rate. *Water Research* 46, 3409–3419. <https://doi.org/10.1016/j.watres.2012.03.043>

Liu, Y., Sun, J., Peng, L., Wang, D., Dai, X., Ni, B.-J., 2016. Assessment of Heterotrophic Growth Supported by Soluble Microbial Products in Anammox Biofilm using Multidimensional Modeling. *Scientific Reports* 6, 1–11. <https://doi.org/10.1038/srep27576>

Lotti, T., Kleerebezem, R., Abelleira-Pereira, J.M., Abbas, B., van Loosdrecht, M.C.M., 2015. Faster through training: The anammox case. *Water Research* 81, 261–268. <https://doi.org/10.1016/j.watres.2015.06.001>

Lotti, T., Kleerebezem, R., Lubello, C., van Loosdrecht, M.C.M., 2014. Physiological and kinetic characterization of a suspended cell anammox culture. *Water Research* 60, 1–14. <https://doi.org/10.1016/j.watres.2014.04.017>

Mampaey KE, Beuckels B, Kampschreur MJ, Kleerebezem R, van Loosdrecht MCM, Volcke EIP. 2011. Modelling nitrous and nitric oxide emissions by autotrophic ammonium oxidizing bacteria. In: Proceedings IWA/WEF Nutrient Recovery and Management Conference, 2011 Miami, FL, USA, January 9–12.

Mampaey, K.E., Beuckels, B., Kampschreur, M.J., Kleerebezem, R., van Loosdrecht, M.C.M., Volcke, E.I.P., 2013. Modelling nitrous and nitric oxide emissions by autotrophic ammonia-oxidizing bacteria. *Environmental Technology* 34, 1555–1566. <https://doi.org/10.1080/09593330.2012.758666>

Mannina, G., Cosenza, A., Ekama, G.A., 2018. A comprehensive integrated membrane bioreactor model for greenhouse gas emissions. *Chemical Engineering Journal* 334, 1563–1572. <https://doi.org/10.1016/j.cej.2017.11.061>

Ni, B.-J., Chen, Y.-P., Liu, S.-Y., Fang, F., Xie, W.-M., Yu, H.-Q., 2009. Modeling a granule-based anaerobic ammonium oxidizing (ANAMMOX) process. *Biotechnology and Bioengineering* 103, 490–499. <https://doi.org/10.1002/bit.22279>

Ni, B.-J., Joss, A., Yuan, Z., 2014a. Modeling nitrogen removal with partial nitrification and anammox in one floc-based sequencing batch reactor. *Water Research* 67, 321–329. <https://doi.org/10.1016/j.watres.2014.09.028>

Ni, B.-J., Peng, L., Law, Y., Guo, J., Yuan, Z., 2014b. Modeling of nitrous oxide production by autotrophic ammonia-oxidizing bacteria with multiple production pathways. *Environmental Science and Technology* 48, 3916–3924. <https://doi.org/10.1021/es405592h>



Ni, B.-J., Rusalleda, M., Pellicer-Nacher, C., Smets, B.F., 2011. Modeling nitrous oxide production during biological nitrogen removal via nitrification and denitrification: Extensions to the general ASM models. *Environmental Science and Technology* 45, 7768–7776. <https://doi.org/10.1021/es201489n>

Ni, B.-J., Ye, L., Law, Y., Byers, C., Yuan, Z., 2013a. Mathematical modeling of nitrous oxide (N<sub>2</sub>O) emissions from full-scale wastewater treatment plants. *Environmental science & technology* 47, 7795–803. <https://doi.org/10.1021/es4005398>

Ni, B.-J., Yuan, Z., Chandran, K., Vanrolleghem, P.A., Murthy, S., 2013b. Evaluating four mathematical models for nitrous oxide production by autotrophic ammonia-oxidizing bacteria. *Biotechnology and Bioengineering* 110, 153–163. <https://doi.org/10.1002/bit.24620>

Pan, Y., Ni, B.J., Lu, H., Chandran, K., Richardson, D., Yuan, Z., 2015. Evaluating two concepts for the modelling of intermediates accumulation during biological denitrification in wastewater treatment. *Water Research* 71, 21–31. <https://doi.org/10.1016/j.watres.2014.12.029>

Pan, Y., Ni, B.-J., Yuan, Z., 2013. Modeling Electron Competition among Nitrogen Oxides Reduction and N<sub>2</sub>O Accumulation in Denitrification. *Environmental Science and Technology* 47, 11083–11091. <https://doi.org/10.1021/ef501790e>

Peng, L., Ni, B.-J., Ye, L., Yuan, Z., 2015a. The combined effect of dissolved oxygen and nitrite on N<sub>2</sub>O production by ammonia oxidizing bacteria in an enriched nitrifying sludge. *Water Research* 73, 29–36. <https://doi.org/10.1016/j.watres.2015.01.021>

Peng, L., Ni, B.-J., Ye, L., Yuan, Z., 2015b. Selection of mathematical models for N<sub>2</sub>O production by ammonia oxidizing bacteria under varying dissolved oxygen and nitrite concentrations. *Chemical Engineering Journal* 281, 661–668. <https://doi.org/10.1016/j.cej.2015.07.015>

Pocquet, M., Queinnec, I., Sperandio, M., 2013. Adaptation and identification of models for nitrous oxide (N<sub>2</sub>O) production by autotrophic nitrite reduction. In: *Proc. 11th IWA Conf. Instrum. Control Autom. ICA2013 Narbonne, France, September 18-20*.

Pocquet, M., Wu, Z., Queinnec, I., Sperandio, M., 2016. A two pathway model for N<sub>2</sub>O emissions by ammonium oxidizing bacteria supported by the NO/N<sub>2</sub>O variation. *Water Research* 88, 948–959. <https://doi.org/10.1016/j.watres.2015.11.029>

Samie, G., Bernier, J., Rocher, V., Lessard, P., 2011. Modeling nitrogen removal for a denitrification biofilter. *Bioprocess and Biosystems Engineering* 34, 747–755. <https://doi.org/10.1007/s00449-011-0524-0>

Stewart, H.A., Al-Omari, A., Bott, C., De Clippeleir, H., Su, C., Takacs, I., Wett, B., Massoudieh, A., Murthy, S., 2017. Dual substrate limitation modeling and implications for mainstream deammonification. *Water Research* 116, 95–105. <https://doi.org/10.1016/j.watres.2017.03.021>

Strous, M., Heijnen, J.J., Kuenen, J.G., Jetten, M.S.M., 1998. The sequencing batch reactor as a powerful tool for the study of slowly growing anaerobic ammonium-oxidizing microorganisms. *Applied microbiology and biotechnology* 50,

589–596.

Takács, I., Vanrolleghem, P.A., Wett, B., Murthy, S., 2007. Elemental balance based methodology to establish reaction stoichiometry in environmental modeling. *Water Science and Technology* 56, 37–41. <https://doi.org/10.2166/wst.2007.606>

Van Hulle, S.W., Volcke, E.I., Teruel, J.L., Donckels, B., van Loosdrecht, M.C., Vanrolleghem, P.A., 2007. Influence of temperature and pH on the kinetics of the Sharon nitrification process. *Journal of Chemical Technology & Biotechnology* 82, 471–480. <https://doi.org/10.1002/jctb>

Van Hulle, S.W.H., Callens, J., Mampaey, K.E., van Loosdrecht, M.C.M., Volcke, E.I.P., 2012. N<sub>2</sub>O and NO emissions during autotrophic nitrogen removal in a granular sludge reactor – a simulation study. *Environmental Technology* 33, 2281–2290. <https://doi.org/10.1080/09593330.2012.665492>

Volcke, E.I.P., Picioreanu, C., De Baets, B., van Loosdrecht, M.C.M., 2010. Effect of granule size on autotrophic nitrogen removal in a granular sludge reactor. *Environmental Technology* 31, 1271–1280. <https://doi.org/10.1080/09593330.2013.859711>

von Schulthess, R., Gujer, W., 1996. Release of nitrous oxide (N<sub>2</sub>O) from denitrifying activated sludge: Verification and application of a mathematical model. *Water Research* 30, 521–530. [https://doi.org/10.1016/0043-1354\(95\)00204-9](https://doi.org/10.1016/0043-1354(95)00204-9)

Wiesmann, U., Choi, I.S., Dombrowski, E.-M., 1994. Fundamentals of Biological Wastewater Treatment. *Generations Journal Of The American Society On Aging* 6, 400. <https://doi.org/10.1002/9783527609604>
